# Supplementary material
Source: HighWire-hosted journal article supplement (http://thorax.bmj.com/highwire/filestream/173961/field_highwire_adjunct_files/0/62suppl1figure.pdf)

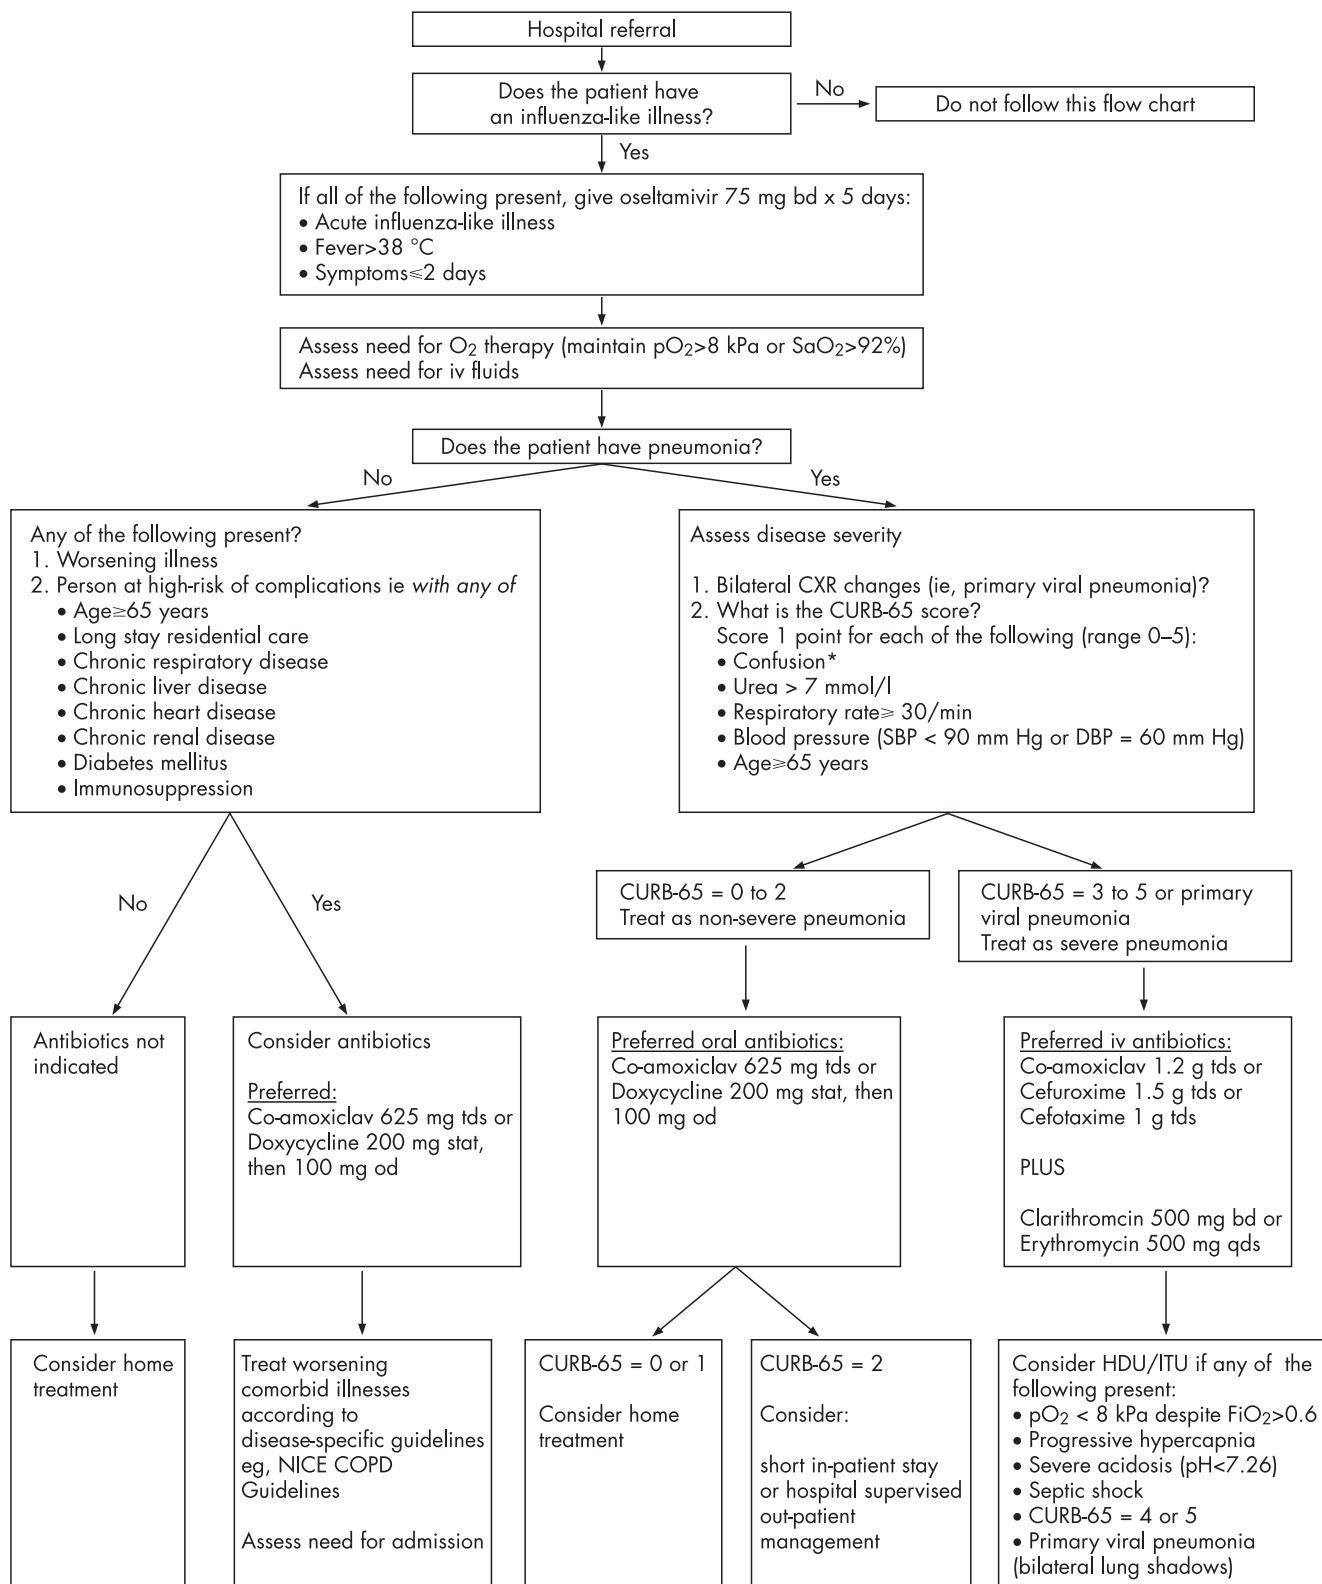

\*Mental Test Score ≤ 8, or new disorientation in person, place or time

Supplement: 62suppl1figure.pdf [file 62suppl1figure.pdf]
